# Supplementary material for: Revised geochronology, correlation, and dinosaur stratigraphic ranges of the Santonian-Maastrichtian (Late Cretaceous) formations of the Western Interior of North America
Source: PLoS One. 2017 Nov 22;12(11):e0188426. doi: 10.1371/journal.pone.0188426 (PMC5699823; doi:10.1371/journal.pone.0188426)
Supplement: S1 Table — Stratigraphic correlation of Upper Cretaceous terrestrial strata of the North American Western Interior from the Santonian through to the K-Pg boundary. Dinosaur taxon ranges plotted on to correlated geological units. (XLS) [file pone.0188426.s001.xls]

## Sheet: Dinosaurs
		Ma			STAGE			WIS AMMONITE BIOZONES			ALASKA			ALBERTA															SASKATCHEWAN			MONTANA																	N. DAKOTA
					Danian						(Fiorillo & Gangloff, 2000)			NW Plains					S. Plains				South Central						SW Plains			West				Central						North		East
														Fanti (2009)					Brinkman (2003)				Eberth & Braman 2012
		65
																							EDMONTON GROUP	SCOLLARD Fm		Upper
																													RAVENSCRAG Fm
																												65.32																FORT UNION Fm	Lebo Mbr		66.06 ± 0.04		FORT UNION Fm
																			WILLOW CREEK Fm
											PRINCE CREEK Fm
																																													Tullock Mbr
		66
					Maastrichtian	upper																				Lower			FRENCHMAN Fm															HELL CREEK Fm	upper
																																															~66.3
																												66.97 ± 0.10																					HELL CREEK
																																													middle
																																													lower
		67
																									BATTLE Fm				BATTLE Fm
																			St MARY RIVER Fm													St MARY RIVER Fm															BATTLE Fm?
																								HORSESHOE CANYON Fm
		68																								Whitemud			WHITEMUD Fm															FOX HILLS Fm	Colgate sst
		68																																													"Tidal flats"
														WAPITI Fm	Unit 5
																										Carbon Mbr			EASTEND Fm
								Jeletzkytes nebrascensis
																										Tolman Mbr
		69
		69
								Hoploscaphites nicolleti
																													BEARPAW Fm
																																													"Lower Mbr"
								H. birkelundi
		70
													70 ± 0.3
		70				lower

								Baculites clinolobatus																				DMT
		71																										70.9
								B. grandis							Unit 4																													BEARPAW Fm					PIERRE SHALE
		71
																										Morrin Mbr
																			BLOOD RESERVE Fm
																										Horsethief Mbr
		72						B. baculus
																	71.89 ± 0.14																		HORSETHIEF Fm
					Campanian	upper
																										Drumheller Mbr
								B. eliasi
		73
		73						B. jenseni
								B. reesidei					73.4				73.73 ± 0.25											73.5 ± 0.4
								B. cuneatus
		74								radiometric & ammonite inconsistency																				Anomalous dates in parentheses
								B. compressus
		74													Unit 3
																	73.77 ± 1.46
																																	BEARPAW
								Didymoceras cheyennense
																									Strathmore Mbr					( 75.04 ± 0.10 )
		75
								Exiteloceras jenneyi																								TWO MEDICINE Fm	lithofacies 5
		75
																														75.03 ± 0.73										75.21 ± 0.12
																							BEARPAW Fm													JUDITH RIVER Fm	Missouri breaks	Coal Ridge Mbr
								D. stevensoni																				75.46 ± 0.24
																			BELLY RIVER Gp
		76
																							BELLY RIVER Gp	DINO. PARK Fm		Lethbridge c.z.		76.10 ± 0.5												76.17 ± 0.07
		76						D. nebrascense																						76.02 ± 0.08
																			(see right)							Muddy zone												McClelland Ferry Mbr
																																	lithofacies 4							76.24 ± 0.18
						middle																						76.39		( 76.39 ± 0.32 )
																										Sandy zone														76.4
		77						B. scotti																						77.2
																												77.03							Upper Discontinuity
		77																						OLDMAN Fm																	Havre		Malta
															Unit 2																		lithofacies 3
																										Unit 2 & 3
																												77.09
																														77.4 ± 0.5
								B. reduncus
		78																												78.03 ± 0.19
		78
								B. gregoryensis
								(B. gilberti)																																			79.22 ± 0.2
		79
								B. perplexus																				Herronton sst
		79
															Unit 1											Unit 1															Rudyard
																								FORE MOST Fm
								B. sp (smooth)
																										Taber c.z.
																																											79.52 ± 0.2
		80
								B. asperiformis																						80.64 ± 0.22
		80																	PAKOWKI Fm		Upper
																										McKay c.z.		80.17 ± 0.15
								B. maclearni						PUSWASKAU Fm			80.7 ± 0.2						PAKOWKI Fm							80.81 ± 0.28
		81																			Lower
								B. obtusus																											Lower Discontinuity
		81
						lower
								B. sp (weak flanking ribs)																						81.08 ± 0.19
																																	lithofacies 1 & 2
								B. sp (smooth)
		82						Scaphites hippocrepis III																								VIRGELLE Fm
		82
								S. hippocrepis II																								TELEGRAPH CREEK Fm
								S. hippocrepis I
																							Deadhorse Coulee Mbr
		83
		83
								S. leei III
																			MILK RIV.
					Sant.	ur.
		84																					Virgelle Mbr
								D. bassleri
		84
								Desmoscaphites erdmanni
																							Telegraph Creek Mbr
						mid.
		85
		85						Clioscaphites. choteauensis
								C. vermiformis
						lr.
		86
		86
								C. saxitonianus
					Coniacian	upper
		87
								S. depressus
		88
						m.
								S. ventricosus
		89				lr.
								S. preventricosus
								S. mariasenis
		90			Turonian	ur.
								Prionocyclus germari
								S. nigricollensis
								Scaphites whitfieldi
						middle
		91						S. ferronensis & S. warreni
								P. macombi
								P. hyatti
		92						Collignoniceras praecox
								C. woollgari
		93						Mammites nodosoides
						lr.
								Vascoceras birchbyi
								Pseudaspidoceras fexuosum
								Watinoceras devonense
		94
[truncated: 1 more columns]

## Sheet: Version history
Version History
Date	Version	Notes
2017-Sep-26	v1.0.01	Utahceratops gettyi note edited
2017-Sep-21	v1.0.01	UCMZ added to repository codes list
2017-Sep-21	v1.0.01	Hell Creek upper duration adjusted to match C29r
2017-Sep-16	v1.0.01	fixed small issue with ash positioning in text box for Two Medicine Fm
2017-Sep-04	v1.0.00	submitted chart & manuscript to PeerJ Preprints (v2 at PeerJ preprints)
2017-May-11	v1.0.00	Minor formatting fixes
2017-Mar-03	v1.0.00	Changed Prenocephale brevis to Foraminacephale brevis sensu Schott & Evans, 2016
2017-Feb-23	v1.0.00	Added version history tab
		Added U-Pb and Ar/Ar dates to Smoky Hollow Mbr, Straight Cliffs Fm
		Added discussion of Cerro del Pueblo age from Kirkland et al., 2000
		Amended Judith River Fm text note to add more information on discontinuity correlation
		Amended Machairoceratops stratigraphic position based on Albright & Titus (2016)
		Amended C33r-C33n boundary sensu changes of Albright & Titus (2016)
		Added magnetostratigraphy of Albright & Titus (2016) for Straight Cliffs & Wahweap fms UT
		Amended Straight Cliffs radiometric date & text (my error in original decay constant used)
		Amended Belly River Gp radiometric date text
		Lehman et al., 2016 add hadrosaur taxon
		McDonald et al., 2010; added taxon Jeyawati
		Minor formatting & spelling fixes
		More explanation added to Black Peaks Fm age discussion
		Wahweap centrosaurine A added (Loewen et al., 2013)
		Nipple Butte Centrosaurine note altered & taxon changed column
		Corrected and added to K-Pg radiometric date in Hell Creek Fm, Montana
		Added Neslen Fm hadrosaur Rhinorex (Gates & Scheetz, 2012)
2016-Oct-25	v0.0.01	Original as submitted to PeerJ Preprints and for review at PLoS ONE

## Sheet: Repository codes
REPOSITORY CODES
ACM	Amherst College Museum, MA, USA
AMNH	American Museum of Natural History, New York, USA
ANSP	Academy of Natural Sciences, Philadelphia, PA, USA
BYU	Brigham Young University Museum of Paleontology, Provo, UT, USA
CMN (was NMC)	Canadian Museum of Nature, Ottawa, Ontario, Canada
CPC	Coleccion Paleontologica de Coahuila, Saltillo, Coahuila, Mexico
DMNH	Denver Museum of Natural History, CO, USA
DMNH	Perot Museum of Nature and Science (was: Dallas Museum of Natural History), TX, USA
FMNH	Field Museum of Natural History, Chicago, IL, USA
IGM	Instituto de Geología, Universidad Nacional Autónoma de México, Mexico
LSUMNS	Louisiana State University Museum of Natural Science, Baton Rouge, LA
MNA	Museum of Northern Arizona, Mesa, AZ, USA
MOR	Museum of the Rockies, Bozeman, MT, USA
MSM	Mesa Southwest Museum, Mesa, AZ, USA
MWC	Museum of Western Colorado, Grand Junction, CO, USA
NHMUK	Natural History Museum, London, UK
NMMNH	New Mexico Museum of Natural History and Science, Albuquerque, NM, USA
PMU	University of Uppsala Museum of Paleontology, Uppsala, Sweden
PU	Princeton University, Princeton, NJ, USA
RAM	Raymond Alf Museum of Paleontology, Los Angeles, CA, USA
ROM	Royal Ontario Museum, Toronto, Ontario, Canada
SDMNH	San Diego Museum of Natural History, CA, USA
SMP	State Museum of Pennysylvania, Harrisburg, PA, USA
TMM	Texas Memorial Museum, Austin, TX, USA
TMP	Tyrrell Museum of Paleontology, Drumheller, Alberta, Canada
UALVP	University of Alberta Laboratory for Vertebrate Paleontology, Calgary, Alberta, Canada
UAMES	University of Alaska Museum, Fairbanks, AK, USA
UCMP	University of California, Berkeley, Museum of Paleontology, CA, USA
UCMZ	University of Calgary Museum of Zoology, Calgary, AB, Canada
UKVP	University of Kansas, Lawrence, KS, USA
UMNH	Utah Museum of Natural History, Salt Lake City, UT, USA
USNM	United States National Museum (Smithsonian), Washington DC, USA
UTEP	Centennial Museum, University of Texas at El Paso, TX, USA
UWGM	UW-Madison Geology Museum, Madison, WI, USA
WDC	Wyoming Dinosaur Center, Thermopolis, WY, USA
YPM	Yale Peabody Museum, New Haven, CT, USA
